# Supplementary material for: Evaluating the Oxidation Rate of Reduced Ferredoxin in Arabidopsis thaliana Independent of Photosynthetic Linear Electron Flow: Plausible Activity of Ferredoxin-Dependent Cyclic Electron Flow around Photosystem I
Source: MDPI journal article supplement (doi:10.3390/ijms241512145), 2023-07-29
Supplement: s1 [file s1]

Supplemental Materials:

Supplemental Table S1

| Field | Chl (mmol m <sup>-2</sup> ) |       |                   | N (mmol m <sup>-2</sup> ) |     |                | Fv/Fm |       |                     | P700max (Relative value) |      |                 | PCmax (Relative value) |      |                 | Fdmax (Relative value) |      |                   |
|-------|-----------------------------|-------|-------------------|---------------------------|-----|----------------|-------|-------|---------------------|--------------------------|------|-----------------|------------------------|------|-----------------|------------------------|------|-------------------|
|       | mean                        | SD    | CI                | mean                      | SD  | CI             | mean  | SD    | CI                  | mean                     | SD   | CI              | mean                   | SD   | CI              | mean                   | SD   | CI                |
| WT    | 0.366                       | 0.036 | difference        | 47.4                      | 5.7 | difference     | 0.799 | 0.002 | difference          | 3.74                     | 0.32 | difference      | 1.96                   | 0.24 | difference      | 0.54                   | 0.08 | difference        |
| crr4  | 0.318                       | 0.018 | (-0.1038, 0.0087) | 50.7                      | 3.2 | (-5.77, 12.30) | 0.799 | 0.005 | (-0.00850, 0.00973) | 3.27                     | 0.21 | (-0.955, 0.030) | 1.71                   | 0.06 | (-0.636, 0.146) | 0.46                   | 0.01 | (-0.2005, 0.0405) |

CI, Confidential Interval of the difference between WT and crr4 (95%); SD, Standard Deviation.

Supplemental Figure S1

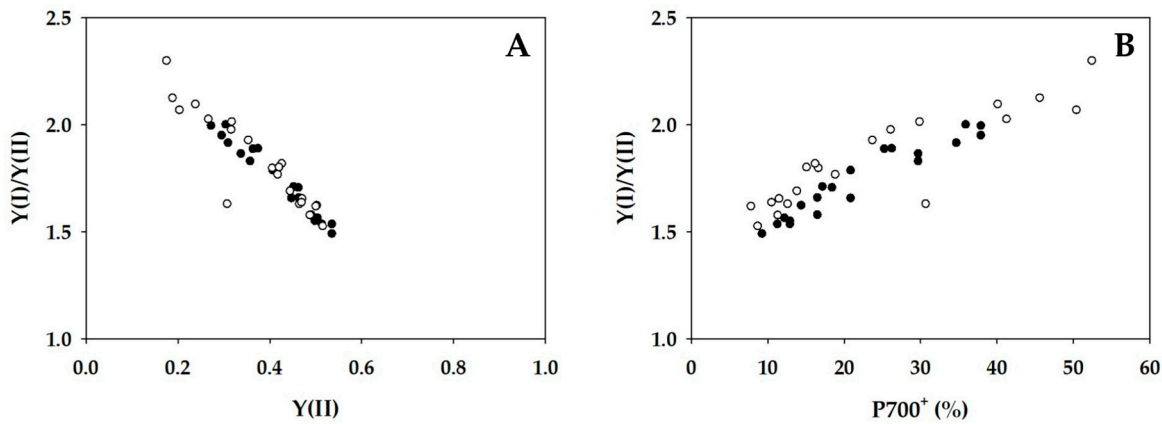

Relationships between Y(I)/Y(II), Y(II), and P700<sup>+</sup>. The data for each parameter were measured in the experiments depicted in Figure 1, simultaneously with the net CO<sub>2</sub> assimilation rates and Y(II). (A) Y(II) and (B) P700<sup>+</sup> were plotted against Y(I)/Y(II). The data were obtained from four independent experiments using leaves attached to four WT and *crr4* plants (*N* = 4). Black symbols, WT; White symbols, *crr4*.
